# Supplementary material for: Mice lacking PLAP-1/asporin counteracts high fat diet-induced metabolic disorder and alveolar bone loss by controlling adipose tissue expansion
Source: PubMed Central journal article supplement (PMC7925592; doi:10.1038/s41598-021-84512-2), 2021-03-02
Supplement: 41598_2021_84512_MOESM1_ESM.pdf [file 41598_2021_84512_MOESM1_ESM.pdf]

# **Mice lacking PLAP-1/aspurin counteracts high fat diet-induced metabolic disorder and alveolar bone loss by controlling adipose tissue expansion**

Hiromi Sakashita<sup>1</sup>, Satoru Yamada<sup>1,2\*</sup>, Masaki Kinoshita<sup>1</sup>, Tetsuhiro Kajikawa<sup>1,#a</sup>, Tomoaki Iwayama<sup>1</sup>, and Shinya Murakami<sup>1\*</sup>

<sup>1</sup> Department of Periodontology, Osaka University Graduate School of Dentistry, Suita, Osaka, Japan

<sup>2</sup> Department of Periodontology and Endodontology, Tohoku University Graduate School of Dentistry, Sendai, Miyagi, Japan

<sup>#a</sup> Current Address: Department of Basic and Translational Sciences, Laboratory of Innate Immunity and Inflammation, Penn Dental Medicine, University of Pennsylvania, Philadelphia, Pennsylvania, United States of America

\* Corresponding author

E-mail: [satoruy@tohoku.ac.jp](mailto:satoruy@tohoku.ac.jp) (SY) and [ipshinya@dent.osaka-u.ac.jp](mailto:ipshinya@dent.osaka-u.ac.jp) (SM)

**Fig S1**

**A**

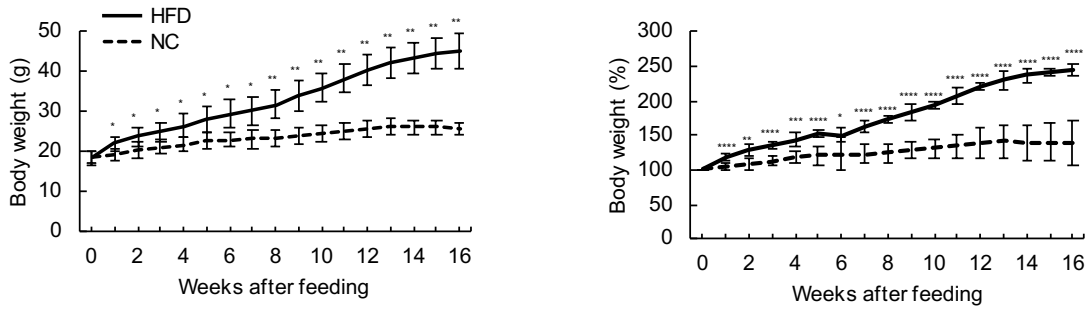

**B**

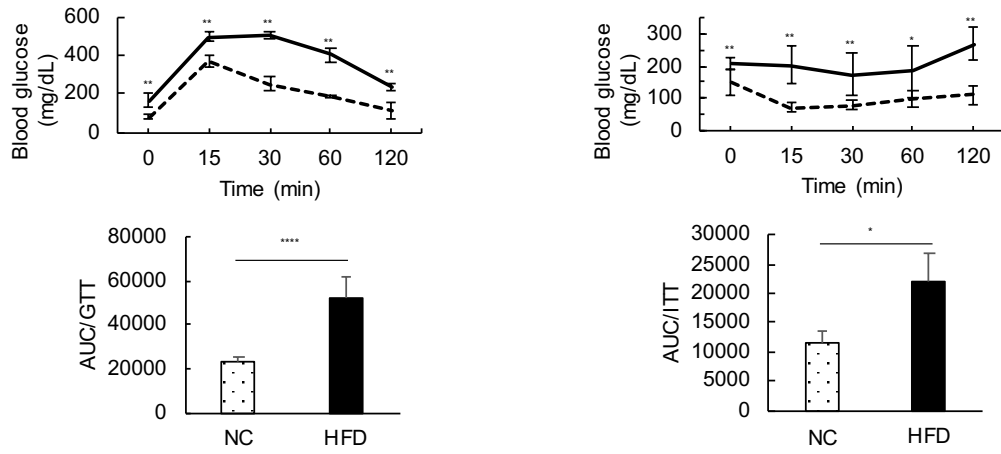

**C**

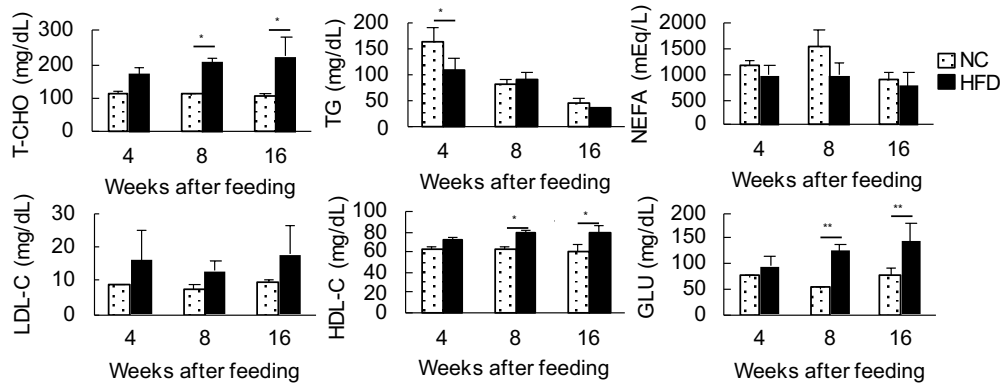

## **Fig S1. HFD-induced obesity and metabolic abnormalities.**

(A) 5-week-old male C57BL/6J mice were fed with high fat diet (HFD) or normal chow diet (NC) and weighted weekly (n = 7 in each group). (B) Glucose tolerance test (GTT) and insulin tolerance test (ITT) were performed in mice after NC or HFD feeding (n = 4 in each group). (C) Serum levels of total cholesterol (T-CHO), triglyceride (TG), LDL-cholesterol (LDL-C), HDL-cholesterol (HDL-C), non-esterified fatty acid (NEFA), glucose (GLU) were measured during NC or HFD feeding (n = 3 in each group). \*:  $p < 0.05$ , \*\*:  $p < 0.01$ , \*\*\*\*:  $p < 0.0001$ .

**Fig S2**

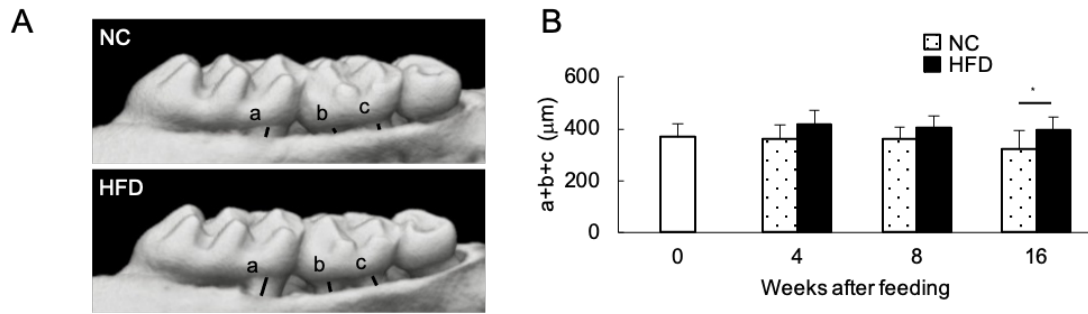

## **Fig S2. HFD-induced alveolar bone resorption.**

(A) Alveolar bone resorption in mice fed with NC or HFD was evaluated by  $\mu$ CT. (B) Distance between alveolar bone crest and cement-enamel junction was measured at distal root of first molar (a), mesial (b) and distal (c) root of second molar (n = 14 in each group). Results show the mean  $\pm$  SD. \*:  $p < 0.05$

**Fig S3**

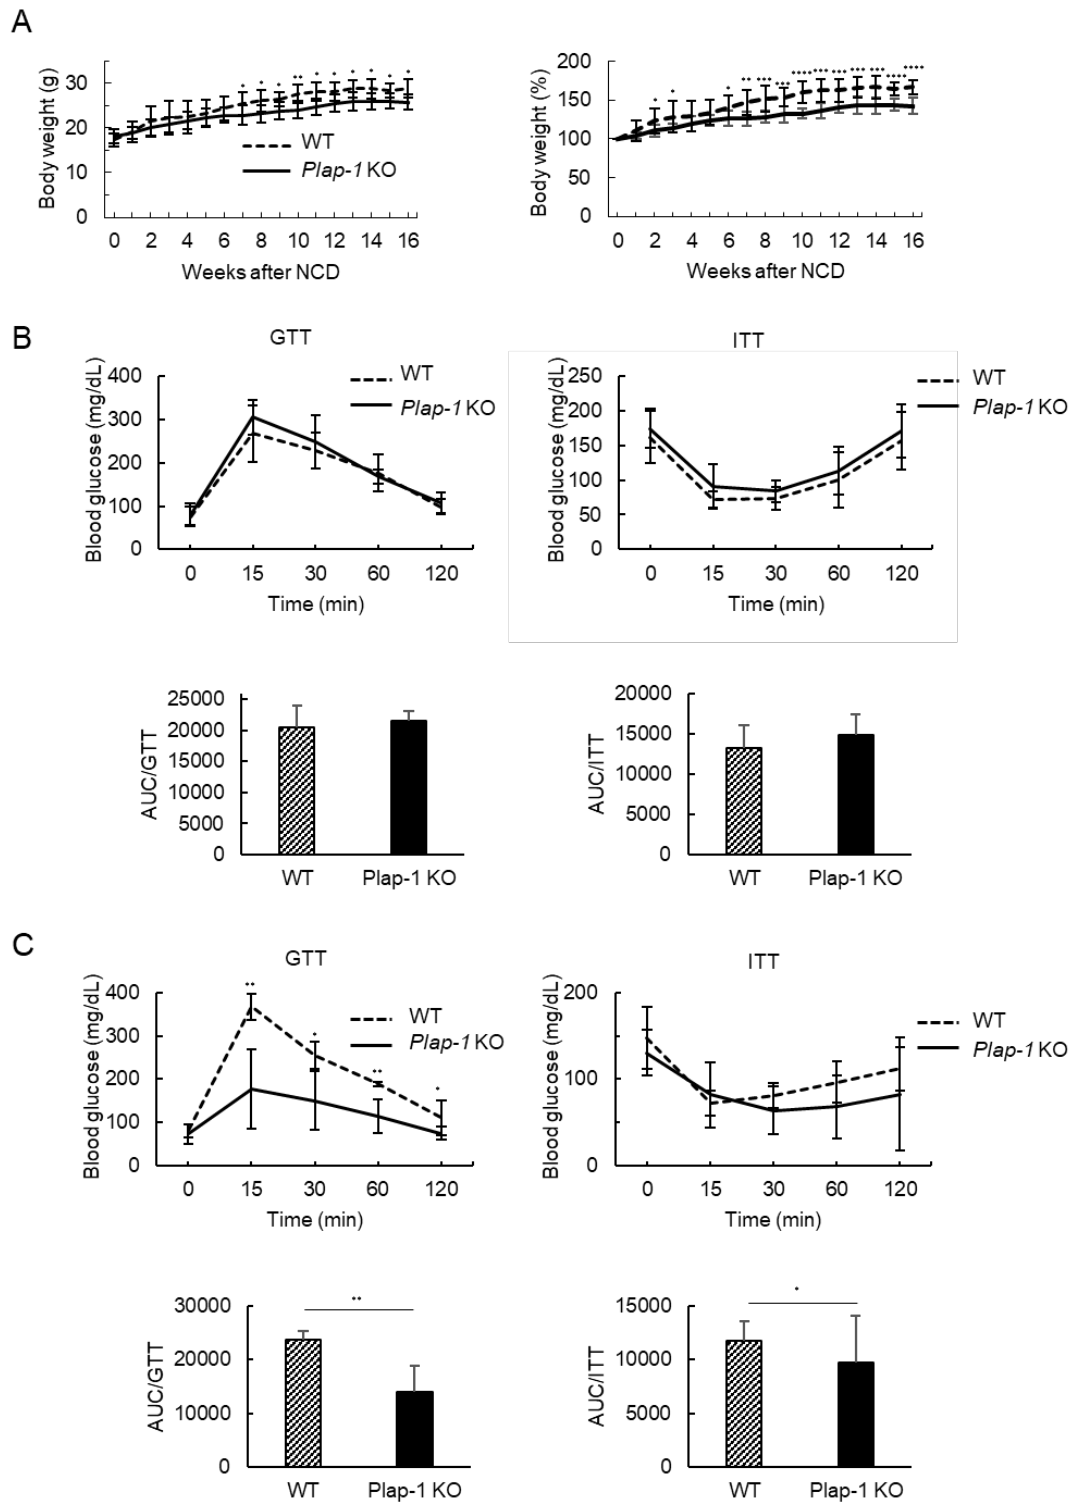

**Fig S3. Body weight change and glucose homeostasis in *Plap-1* KO mice with NC feeding.**

(A) Body weight changes in WT and *Plap-1* KO mice during NC feeding. 5-week-old male WT and *Plap-1* KO mice were fed with NC and weighted weekly. WT ( $n = 11$ ), *Plap-1* KO ( $n = 8$ ). Results show the mean  $\pm$  SD. (B) GTT and ITT were performed in 5-week-old male WT and *Plap-1* KO mice ( $n = 9$  in each group). (C) GTT and ITT were performed in WT and *Plap-1* KO mice after 16 weeks NC feeding. For GTT, WT ( $n = 8$ ), *Plap-1* KO ( $n = 7$ ) and for ITT, WT ( $n = 8$ ), *Plap-1* KO ( $n = 8$ ). Results show the mean  $\pm$  SD. \*:  $p < 0.05$ , \*\*:  $p < 0.01$ , \*\*\*:  $p < 0.001$ , \*\*\*\*:  $p < 0.0001$ .

**Fig S4**

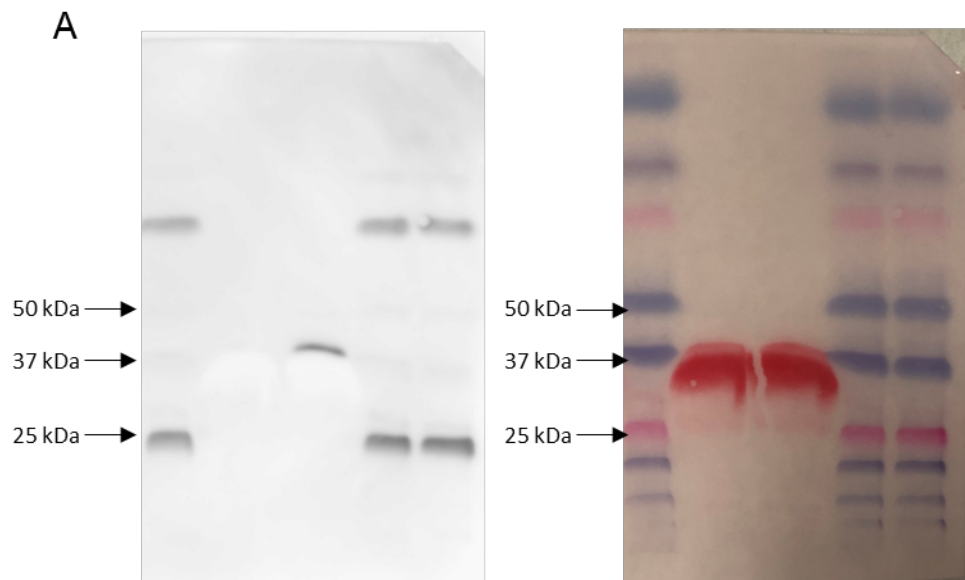



### **Fig S3. Immunoblots performed in this study**

(A) anti-FLAG blot (left) and Ponceau S staining (right).

**Table S1**

| Gene of interest |              | Forward primers sequences  | Reverse primers sequences |
|------------------|--------------|----------------------------|---------------------------|
| <i>Aspn</i>      | NM_025711    | atgatgacgataacgatgatgacga  | tgttgtttggaaccgatgacaga   |
| <i>Adipoq</i>    | NM_009605    | ttctgtctgtacgattgtcagtggga | ggcatgactgggcaggatta      |
| <i>Lep</i>       | NM_008493    | gaacctgtctactcatgccagcac   | ctggctctgcagcctgtttg      |
| <i>Adgre1</i>    | NM_010130    | gctatgggcttccagtctggtggt   | gaaggcagcaacctcgtgccttg   |
| <i>Tnf</i>       | NM_013693    | aagcctgtagccacgtcgta       | ggcaccactagttggttgcctttg  |
| <i>Il6</i>       | NM_031168    | ccacttcacaagtcggaggctta    | gcaagtgcacatcatcgttgcatac |
| <i>Ccl3</i>      | NM_011337    | catgacactctgcaaccaagtcttc  | gagcaaaggctgttggttca      |
| <i>Arg1</i>      | NM_007482    | agctctgggaatctgcatgg       | atgtacacgatgtctttggcagata |
| <i>Chil3</i>     | NM_009892    | gatggcctcaacctggactg       | cgtaaatgattcctgctcctg     |
| <i>Clec7a</i>    | NM_001309637 | ggtaccctgactcaaattcacaac   | caccacagtaagtaggctgattctc |
| <i>Fabp4</i>     | NM_024406    | tgggaacctggaagcttgtctc     | gaattccacgcccagtttga      |
| <i>Pparg</i>     | NM_011146    | ggagcctaagttgagtttgcctgtg  | tgcagcaggttgccttggatg     |
| <i>Cebpa</i>     | NM_007678    | ttgaagcacaatcgatccatcc     | gcacactgccattgcacaag      |
| <i>Coll1a1</i>   | NM_007742    | cagggtattgctggacaacgtg     | ggacctgtttgccaggttca      |
| <i>Col3a1</i>    | NM_009930    | caggccagtggcaatgtaaaga     | ctcattgccttgcgtgtttgata-  |
| <i>Col6a1</i>    | NM_009933    | gagcttctcgtatgacggcttcc    | gagctgtctagcaggatggtgatg  |
| <i>Dcn</i>       | NM_007833    | ctgggctggcacagcataagta     | cggacaggggtgccgtaaag      |
| <i>Bgn</i>       | NM_007542    | gatgattgagaatgggagcctga    | tccgaagcccataggacagaag    |
| <i>Hprt</i>      | NM_013556    | ttgttgggatatgcccttgacta    | aggcagatggccacaggacta     |
